# Supplementary material for: Structural and functional analysis of the promiscuous AcrB and AdeB efflux pumps suggests different drug binding mechanisms
Source: Springer Nature journal article supplement (doi:10.1038/s41467-021-27146-2), 2021-11-25
Supplement: MOESM1 [file 41467_2021_27146_MOESM1_ESM.pdf]

## Supplementary Information

# Structural and functional analysis of the promiscuous AcrB and AdeB efflux pumps suggests different drug binding mechanisms

**Alina Ornik-Cha<sup>1§</sup>, Julia Wilhelm<sup>1§</sup>, Jessica Kobylka<sup>1</sup>, Hanno Sjuts<sup>1,2</sup>, Attilio V. Vargiu<sup>3</sup>, Giuliano Mallocci<sup>3</sup>, Julian Reitz<sup>4,5</sup>, Anja Seybert<sup>4,5</sup>, Achilleas S. Frangakis<sup>4,5\*</sup>, Klaas M. Pos<sup>1\*</sup>**

<sup>1</sup>Institute of Biochemistry, Goethe-University Frankfurt, Max-von-Laue-Str. 9, D-60438 Frankfurt am Main, Germany.

<sup>2</sup>present address: Biologics Research, Sanofi-Aventis Deutschland GmbH, Frankfurt, Germany

<sup>3</sup>Department of Physics, University of Cagliari, 09042 Monserrato (CA), Italy

<sup>4</sup>Buchmann Institute for Molecular Life Sciences, Goethe-University Frankfurt, Max-von-Laue-Str. 15, D-60438 Frankfurt am Main, Germany.

<sup>5</sup>Institute of Biophysics, Goethe-University Frankfurt, Max-von-Laue-Str. 15, D-60438 Frankfurt am Main, Germany.

<sup>§</sup>Contributed equally

\* Correspondence to Klaas M. Pos ([pos@em.uni-frankfurt.de](mailto:pos@em.uni-frankfurt.de)) or Achilleas Frangakis ([achilleas.frangakis@biophysik.org](mailto:achilleas.frangakis@biophysik.org))

## A AdeB in DDM

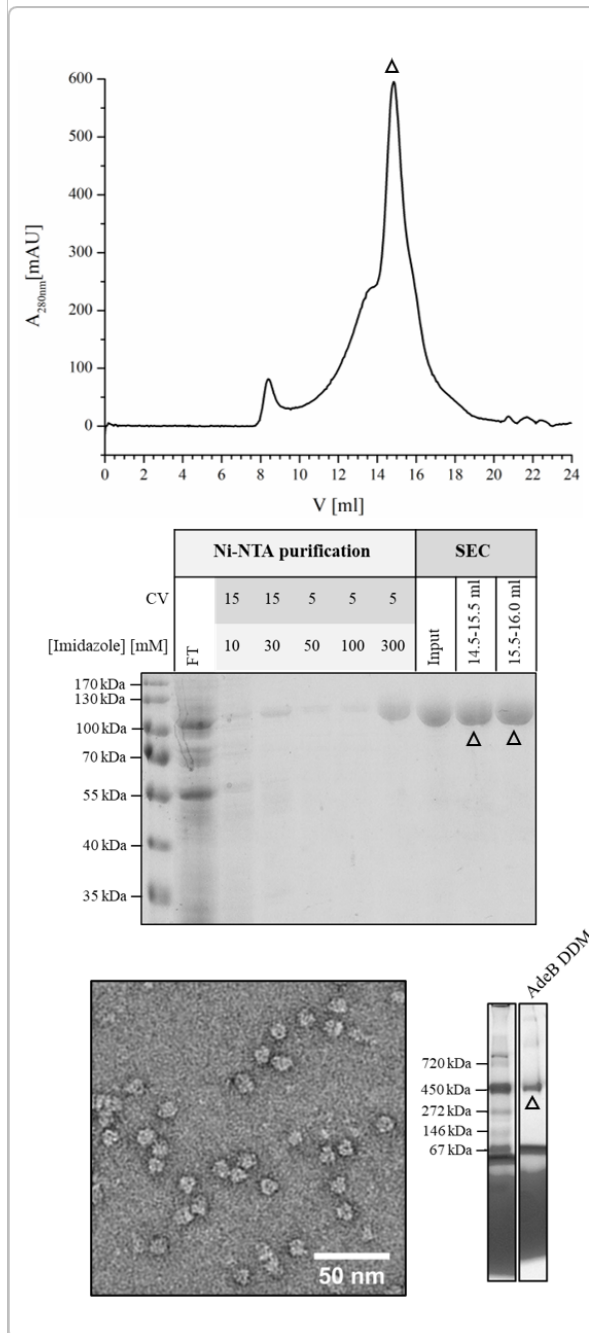

## B AdeB in Salipro Nanodiscs

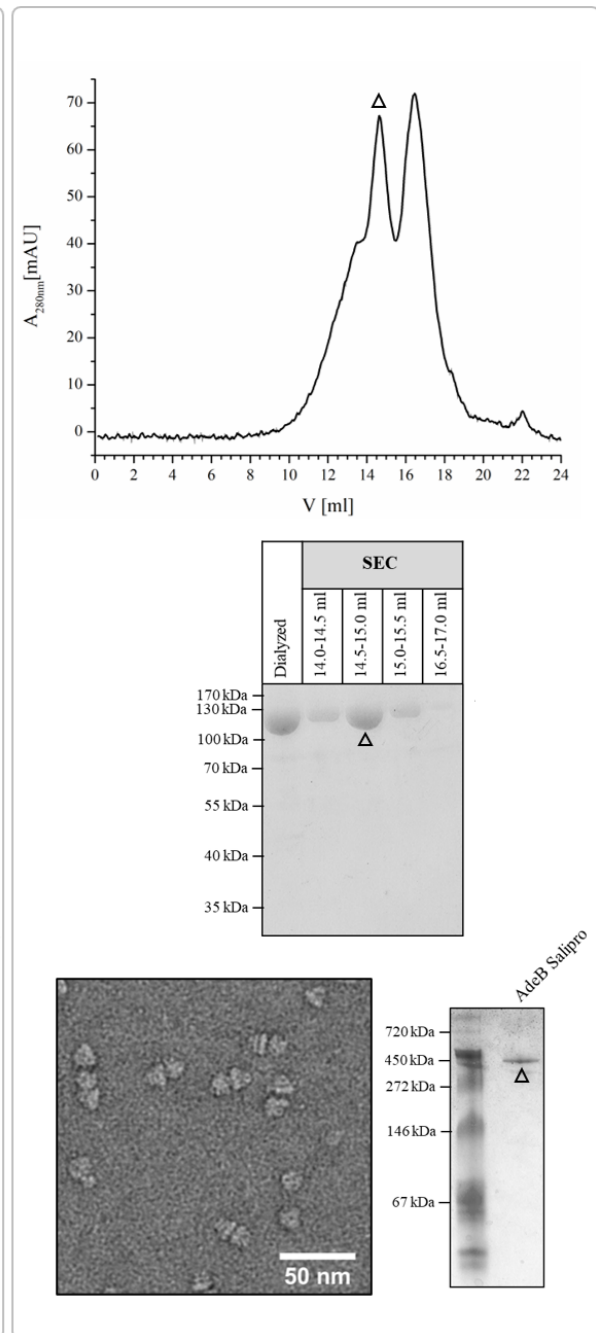

Supplementary Figure 1. **Purification and reconstitution of AdeB into Salipro Nanodiscs.** **A** AdeB was purified after heterologous expression in *E. coli* by Ni-NTA IMAC followed by size exclusion chromatography (SEC). Samples were analyzed by SDS-PAGE showing high purity. A homogenous trimeric assembly could be confirmed by negative stain EM and native PAGE. **B** AdeB was reconstituted in Salipro Nanodiscs and purified by SEC. Again, samples were analyzed by SDS-PAGE, negative stain EM and native PAGE showing high purity of the trimeric particles. The fractions selected for further procedures are marked by triangles. SEC and SDS-PAGE analysis was conducted three times and Native PAGE/negative stain EM was done once. Source data are provided as a Source Data file.

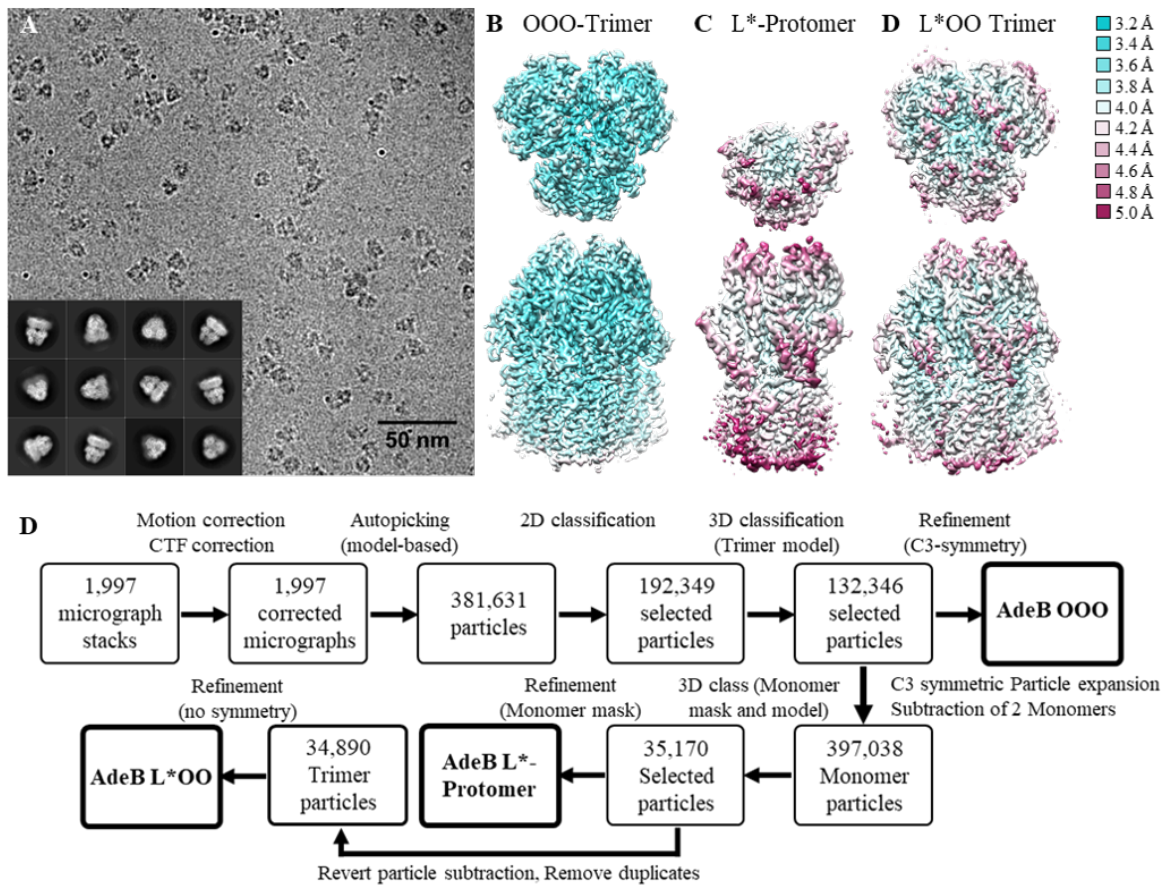

Supplementary Figure 2. **Cryo-EM density maps of AdeB.** **A** Exemplary micrograph (out of 1,997 micrographs, supplementary Table 1) of AdeB at -3.7  $\mu\text{m}$  defocus and representative 2D class averages. Density maps **B**, **C**, **D** are shown in top and side view and colored by local resolution. **B** AdeB density map in OOO conformation with an overall resolution of 3.54  $\text{\AA}$ . **C** AdeB L\* conformation with a resolution of 3.95  $\text{\AA}$ . **D** AdeB in L\*OO conformation at 3.84  $\text{\AA}$  resolution. The L\* conformation is oriented to the front. **E** Flowchart of the data processing procedure. FSC curves and angular distribution of all maps are shown in Supplementary Figure 3.

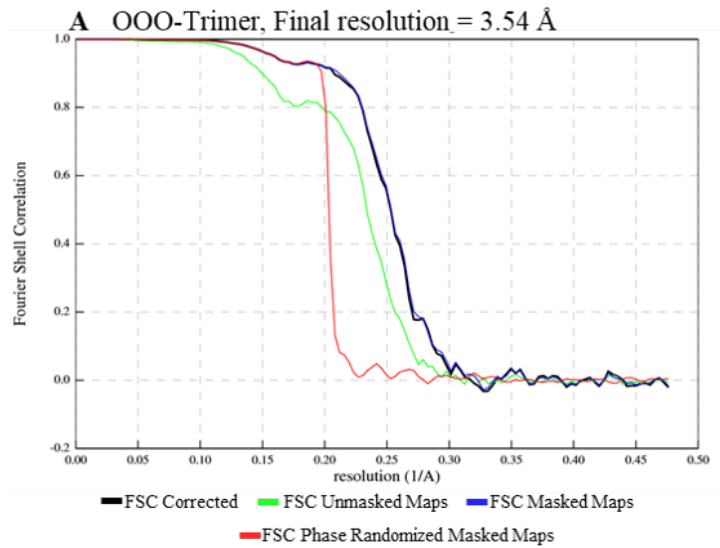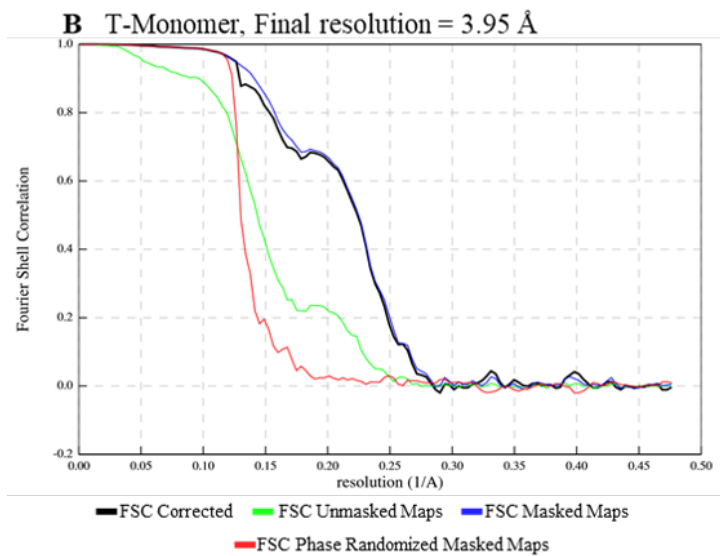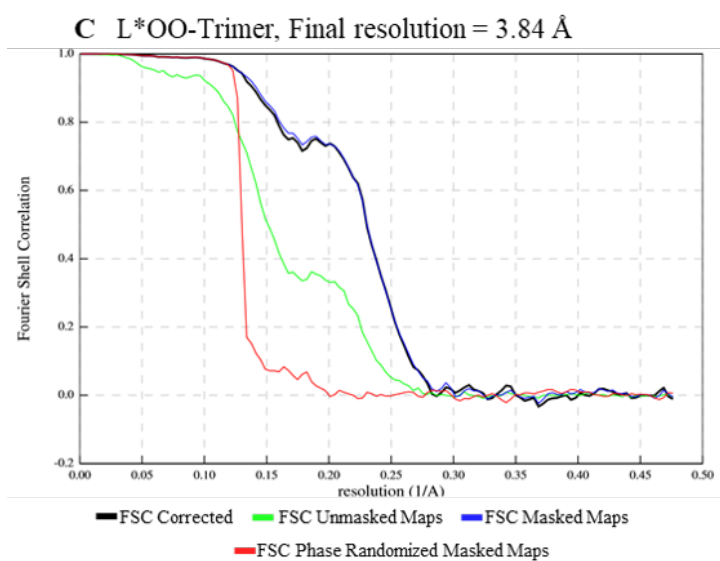

Supplementary Figure 3. **Fourier shell correlation (FSC) and angular distribution of AdeB density maps. A** OOO conformation, **B** L\* conformation and **C** L\*OO conformation.

**A** AdeB OOO

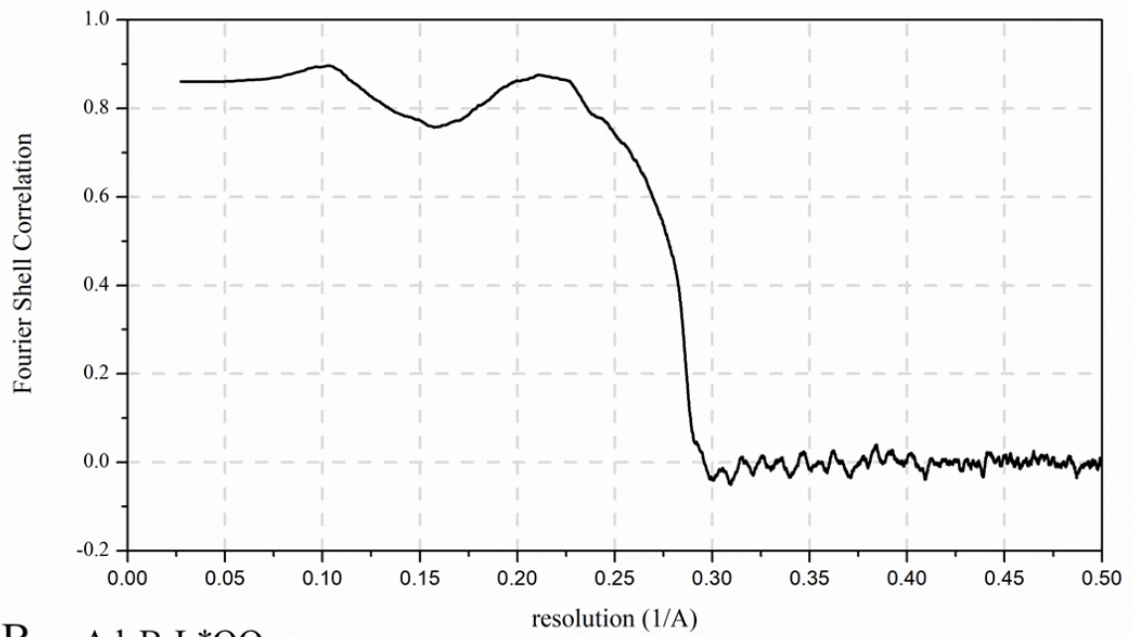

**B** AdeB L\*OO

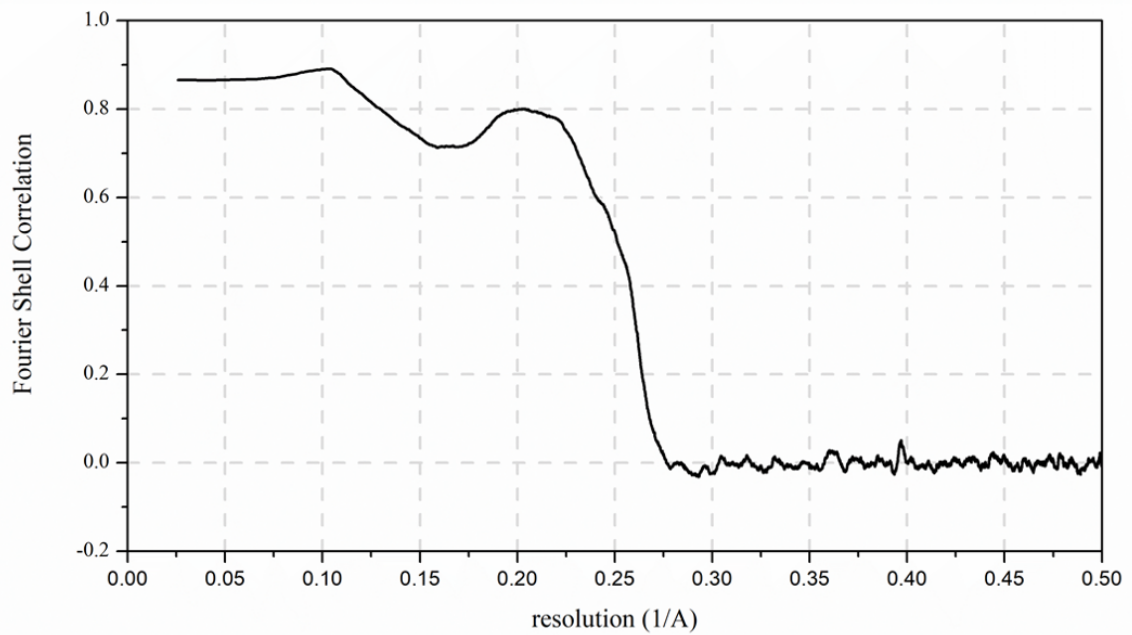

Supplementary Figure 4. **Fourier shell correlation (FSC) of EM maps to modelled structures of AdeB. A OOO and B L\*OO conformations.**

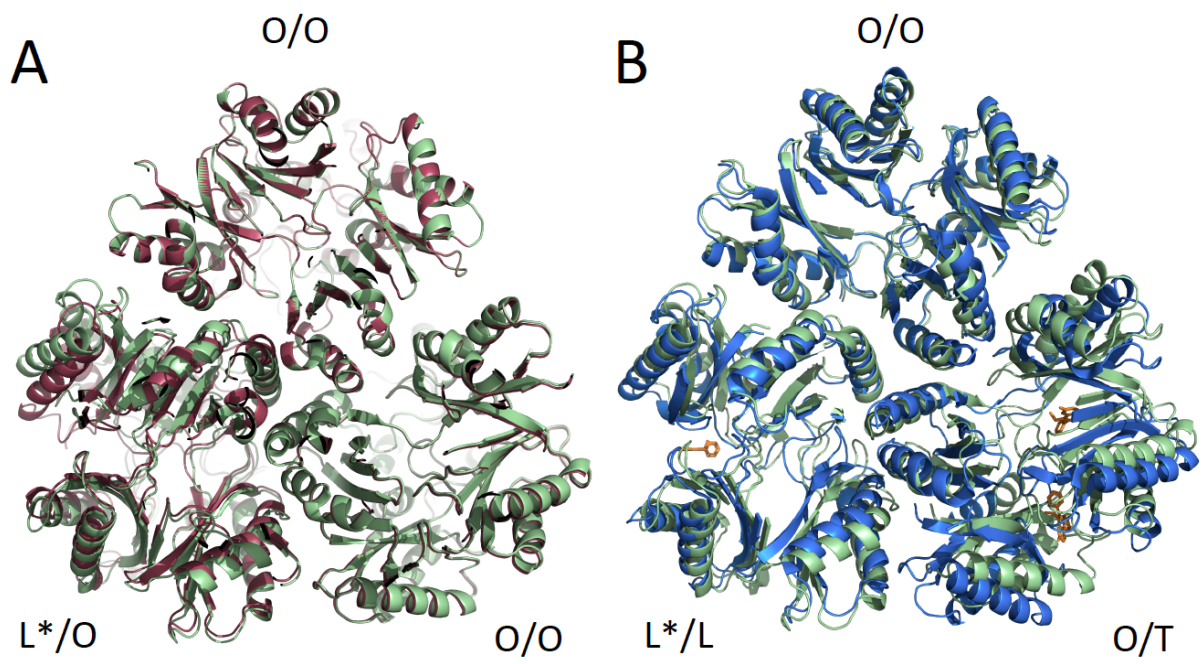

Supplementary Figure 5. Superimposition of the porter domain of the L\*OO structure (green) with (A) the OOO structure (red) and (B) LTO (access/binding/extrusion, PDB: 7KGI) structure (blue). Ethidium molecules bound to the L and T protomers in the LTO structure are displayed as yelloworange sticks.

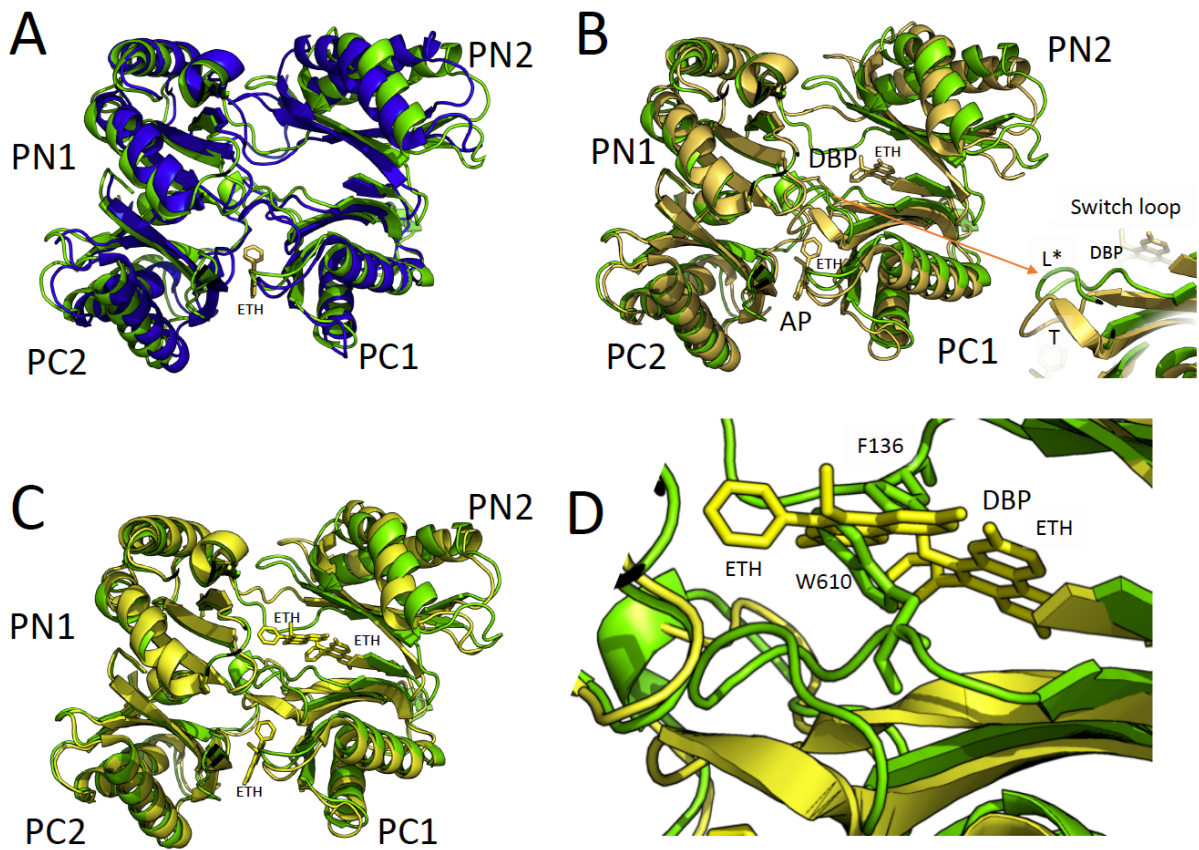

Supplementary Figure 6. **Superimpositions of the AdeB periplasmic porter domains.** Superimposition of the L\* protomer (green) with **A** the L (access, blue) conformation of the LTO structure (access/binding/extrusion, PDB: 7KGI) with ethidium (yellow sticks) bound in the access pocket (AP) (rmsd: 2,1 Å), with **B** the T conformation (orangeyellow) of the LTO structure (access/binding/extrusion, PDB: 7KGI) with ethidium (yellow sticks) bound in the AP and the deep binding pocket (DBP) (rmsd: 1,9 Å). Inset: the L\* switch loop (green) is oriented toward the DBP, whereas the T switch loop (yellow) orientation is toward the AP. **C** the T conformation (yellow) of the TOO structure (binding/extrusion/extrusion, PDB: 7KGI) with ethidium (yellow sticks) bound in the AP and two ethidium molecules (yellow sticks) bound to the DBP (rmsd: 1,6 Å). **D** residues F136 and W610 (green sticks) in the L\* protomer are given as an example to indicate that substrate binding in this protomer is prohibited in the DBP due to steric clash.

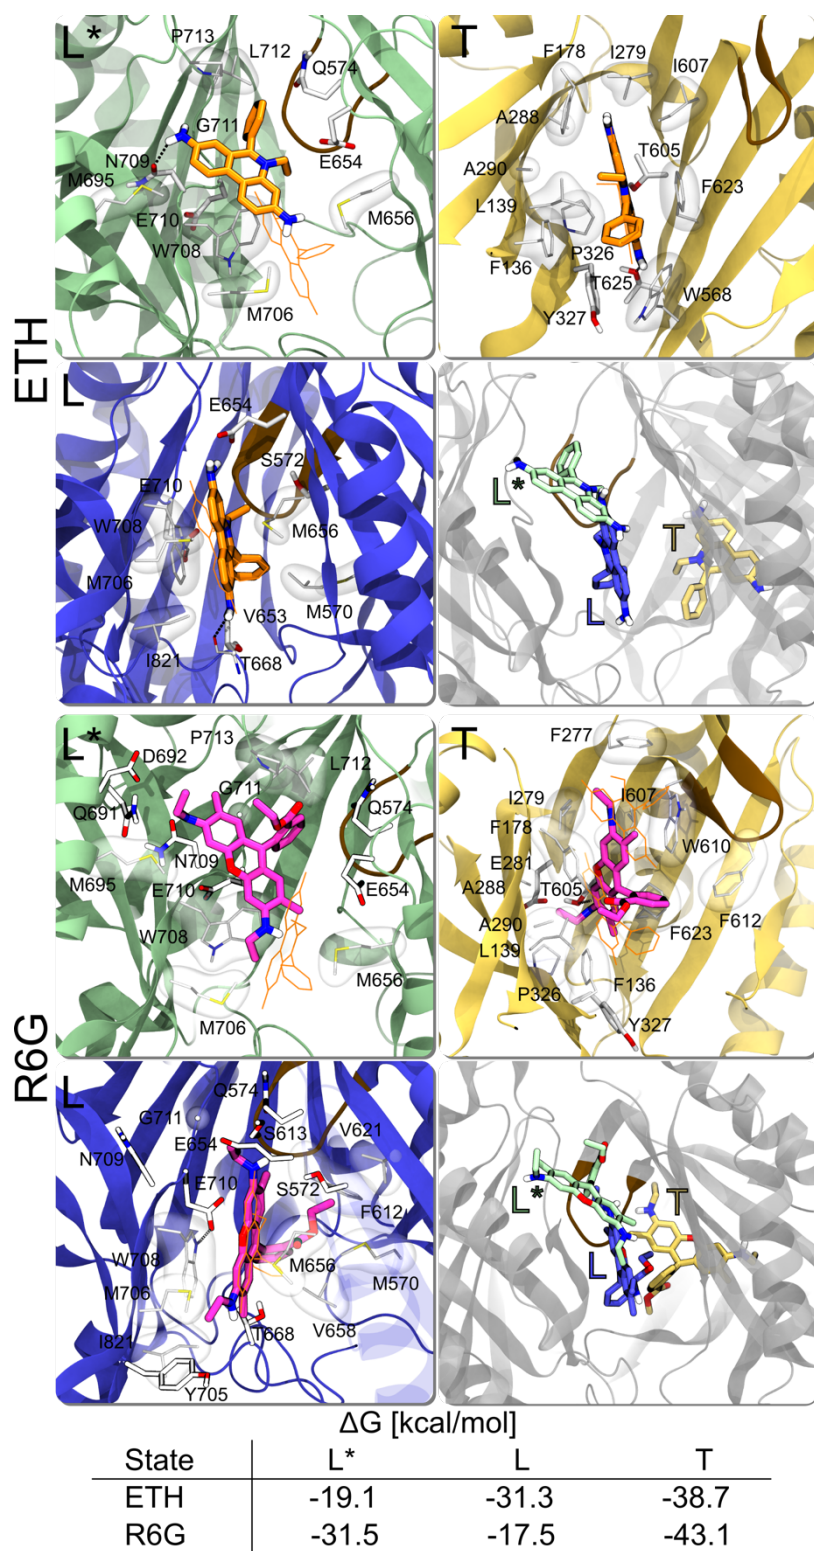

Supplementary Figure 7. **Selected docking poses of ETH and R6G on the L\*, L, and T protomers of AdeB.** Docking poses of ETH (top 2x2 panel, C atoms in orange) and R6G (bottom panel, C atoms in magenta) in the L\*, L, and T protomers (cartoon in green, blue, and yellow color, respectively). The switch loop is highlighted in ochre. Sidechains (or backbone atoms forming H-bonds with the ligand) of polar and apolar residues within 3.5 Å of the ligand are shown by thick and thin sticks, respectively, colored by atom type (C atoms in light grey). The approximate molecular envelope of apolar residues is also shown as transparent surface. The experimental poses of ETH in the L and T protomers (PDB IDs: 7KGI and 7KGG) are shown as reference (thin orange sticks). The bottom-right picture in each panel shows the combined docking poses in the L\*, L and T protomers as sticks colored by protomer (L\*, green, L, blue, and T, yellow). Below the images the estimated  $\Delta G$  values for ETH and R6G binding are listed.



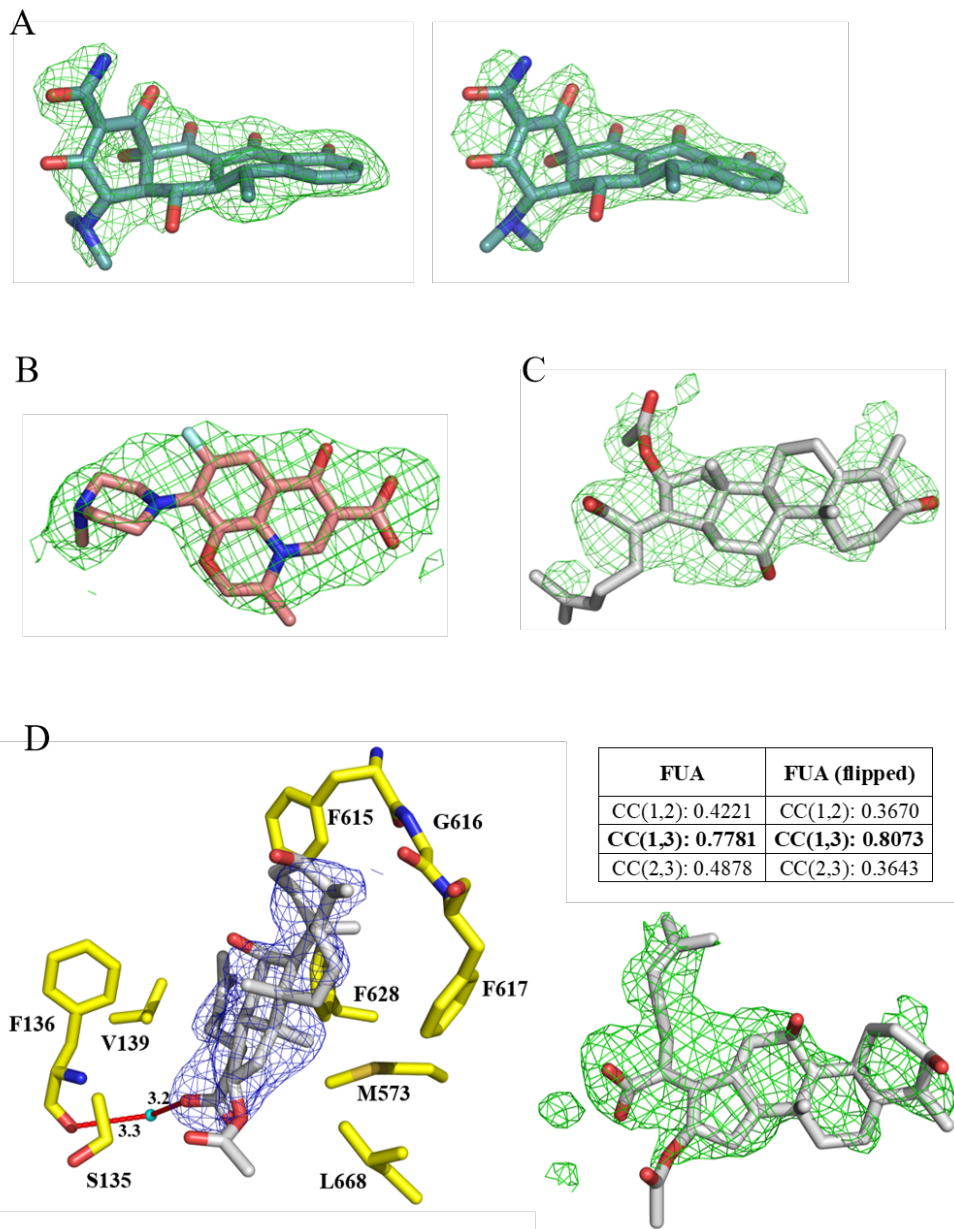

Supplementary Figure 8. **Residual (Polder) electron density maps.** Polder maps of **A** doxycycline (DXT-1, left; DXT-2, right), **B** levofloxacin (LFX) and **C** fusidic acid (FUA). Polder maps (green-colored mesh) are contoured at  $4.5\sigma$  (DXT) or  $4\sigma$  (LFX, FUA). The assigned ligand molecules are represented as sticks (carbon = dark green (DXT); carbon = salmon (LFX); carbon = grey (FUA); nitrogen = blue; oxygen = red; fluoride = pale blue). **D** Alternative (flipped) FUA orientation within the AcrBper DBP. The  $2F_o - F_c$  electron density map (blue-colored mesh) is contoured at  $0.8\sigma$  and the residual (Polder) electron density map is contoured at  $4\sigma$ . Local correlation coefficients (CC) between three Polder maps m1 (calculated  $F_{obs}$  with ligand), m2 (calculated  $F_{obs}$  without ligand) and m3 (real  $F_{obs}$  data) are indicated for both FUA conformations.

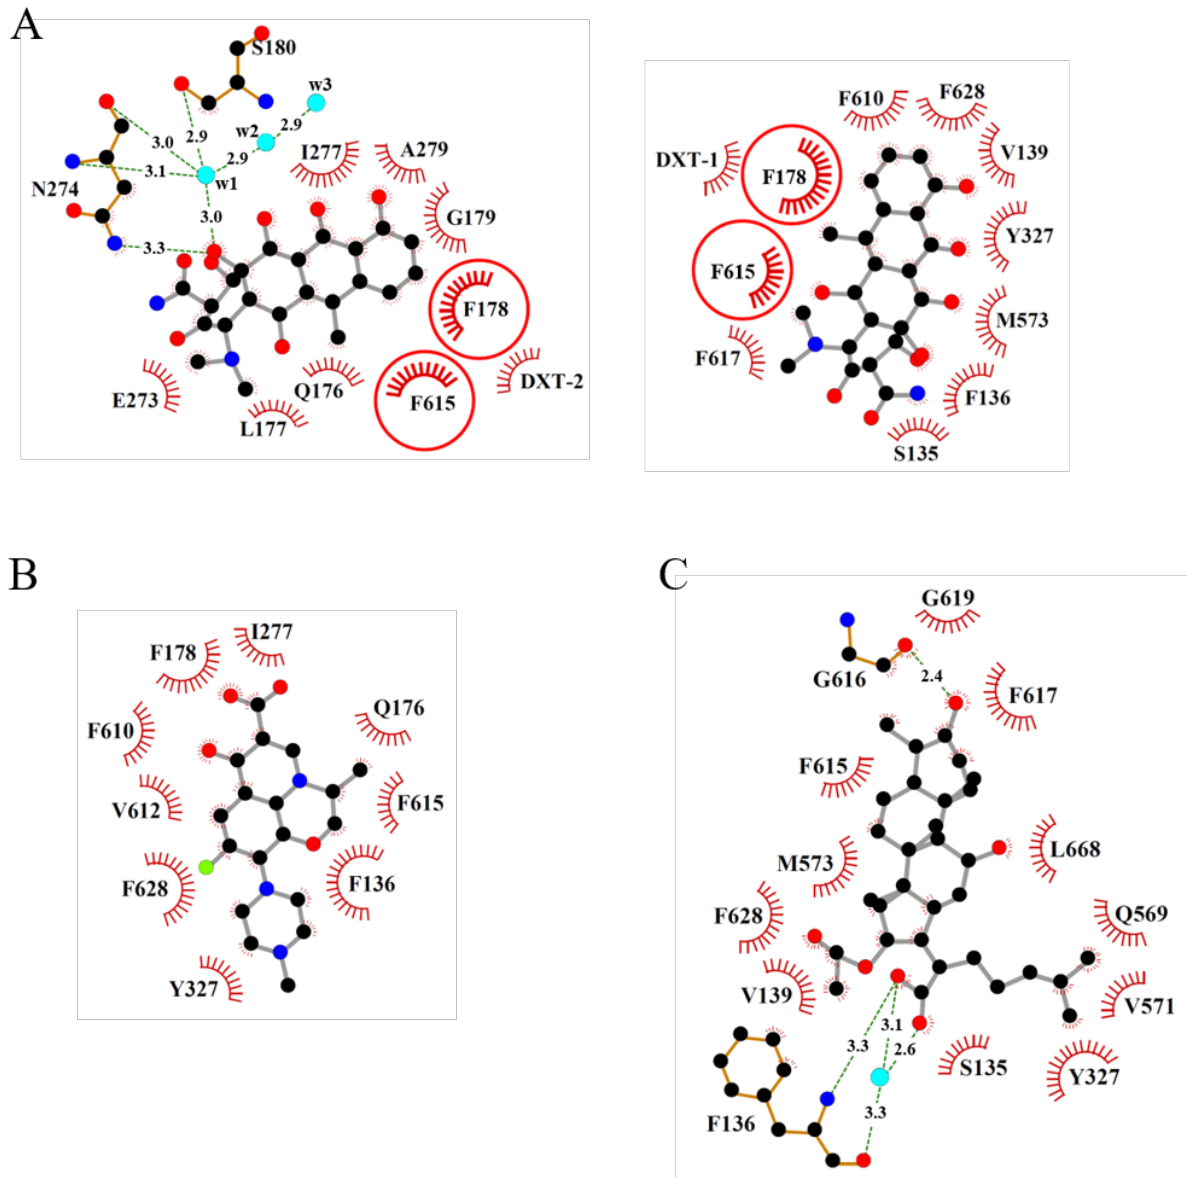

Supplementary Figure 9. **LigPlot+ analysis of ligand binding to the AcrBper DBP.** **A** LigPlot+ analysis of the two doxycycline binding modes, DXT (left) and DXT-2 (right), to the AcrBper DBP. AcrBper residues interacting with both DXT molecules are circled in red. **B** LigPlot+ analysis of levofloxacin and **C** fusidic acid binding to the AcrBper DBP. The ligands are shown in ball-and-stick representation (carbon = black; nitrogen = blue; oxygen = red; fluoride = green; bonds = grey). Hydrophobic interactions between the ligands and AcrBper DBP residues are represented with red brush-like structures. Water molecules and hydrogen bonds are shown as cyan spheres and green dashed lines, respectively, with the numbers representing the H-bond distances in Å.

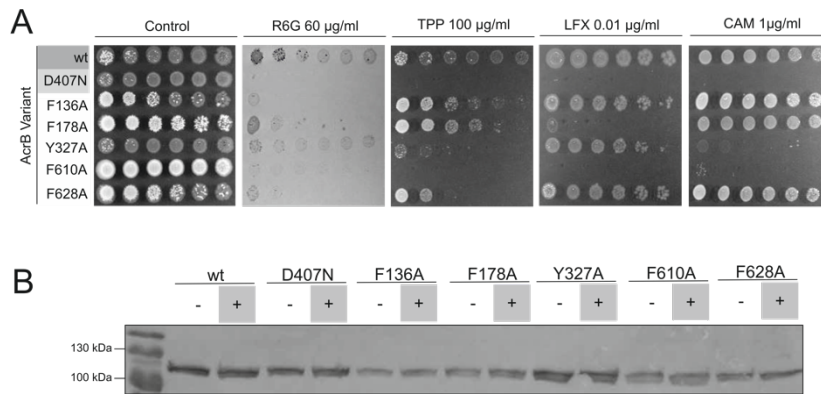

Supplementary Figure 10. **Comparison of drug susceptibilities of *E. coli* cells harbouring *E. coli* AcrB, wildtype, inactive mutant (D407N) and deep binding pocket AcrB single-substitution variants (F136A, F178A, Y327A, F610A, F628A).** **A** Plate dilution assays were performed with *E. coli* BW25113  $\Delta$ *acrB*  $\Delta$ *acrD*  $\Delta$ *mdtBC* pRSFDuetFX\_MS\_adeAC harbouring pET24\_ocrB or mutants. Dilution series of overnight cultures with an OD<sub>600</sub> of 10<sup>0</sup>, 10<sup>-1</sup>, 10<sup>-2</sup>, 10<sup>-3</sup>, 10<sup>-4</sup> and 10<sup>-5</sup> were spotted on a Mueller-Hinton (MH) agar plates containing 50 µg/ml kanamycin (Km), 50 µg/ml carbenicillin (Carb), 20 µM IPTG with or without (control plates) the tested drug. Plates were supplemented with the compounds and concentrations indicated. All experiments were performed four times (biological replicates 1-4, on different days with newly transformed clones), a representative experiment is shown. **B** Western blot analysis of DDM-solubilized protein samples before (-) and after (+) ultracentrifugation to detect levels of correctly folded AcrB variants via anti-AcrB antibody. Western Blot analysis was done once. Plate dilution biological replicate results 1-4 and Western Blot analysis full scan image is available in a Source Data file.

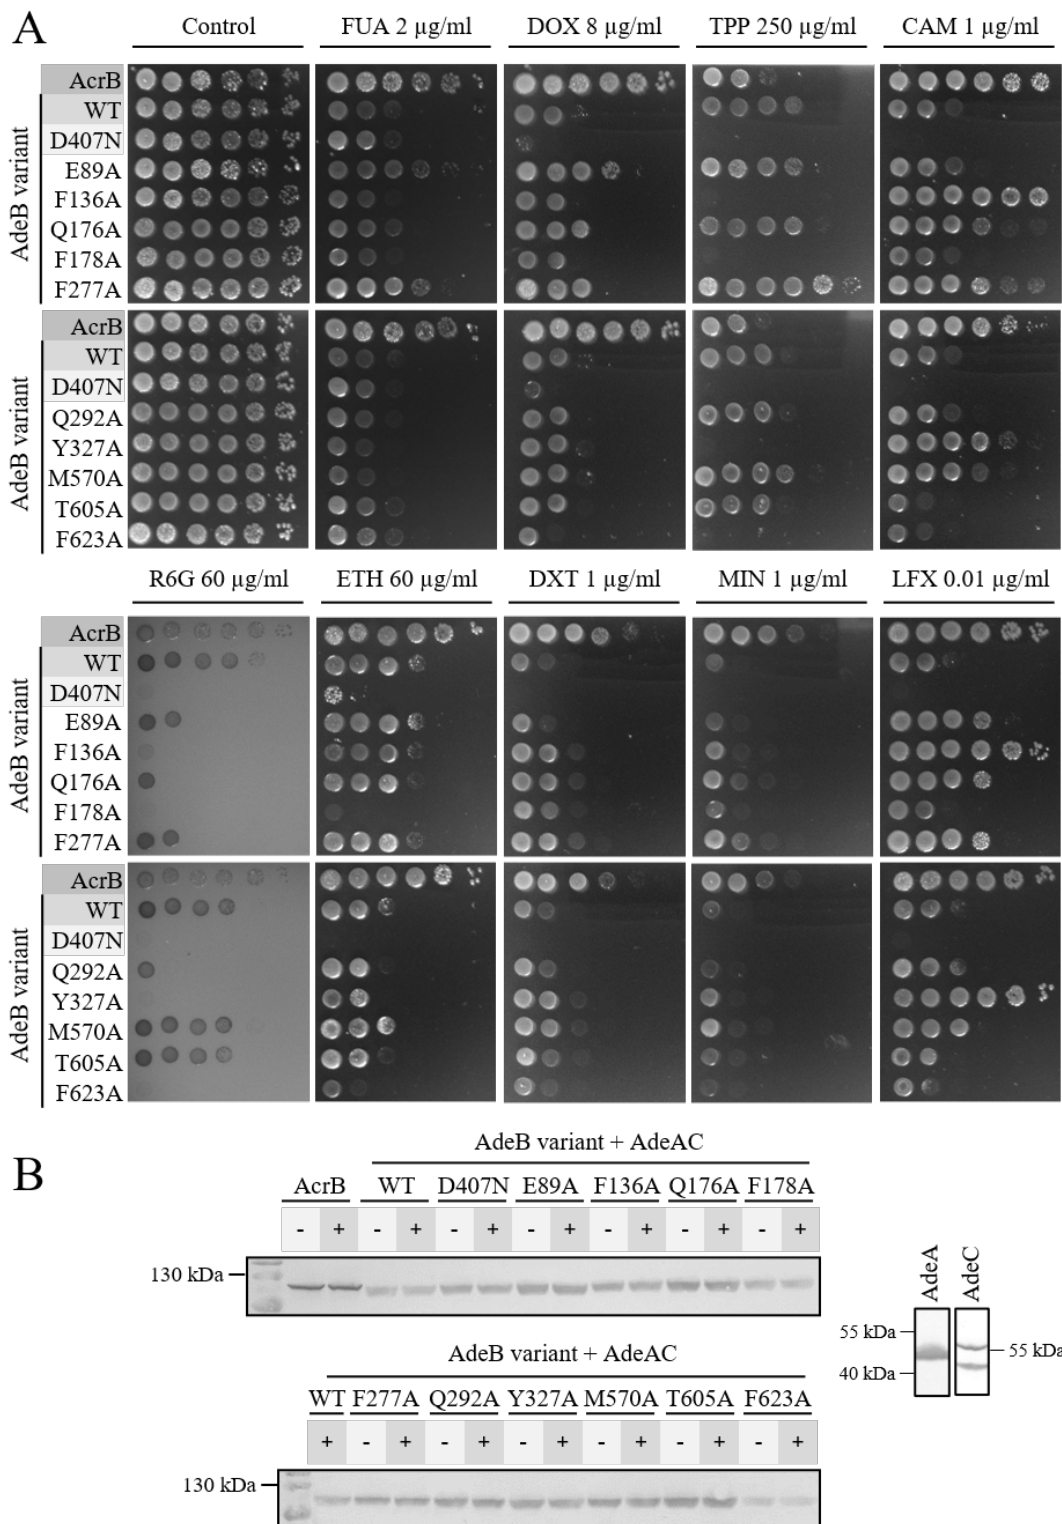

Supplementary Figure 11. Comparison of drug susceptibilities of *E. coli* cells harbouring *E. coli* AcrB, wildtype *A. baumannii* AdeB (WT), inactive mutant (D407N) and deep binding pocket single-Ala variants (E89A, F136A, Q176A, F178A, F277A, Q292A, Y327A, M570A, T605A, F623A). **A** Plate dilution assays were performed with *E. coli* BW25113  $\Delta$ acrB  $\Delta$ acrD  $\Delta$ amtBC pRSFDuetFX\_MS\_adeAC harboring pET24\_acrB or p7XC3H\_adeB\_WT and mutants. Dilution series of overnight cultures with an OD600 of  $10^0$ ,  $10^{-1}$ ,  $10^{-2}$ ,  $10^{-3}$ ,  $10^{-4}$  and  $10^{-5}$  were spotted on a Mueller-Hinton Agar plate containing 50 µg/ml kanamycin, 50 µg/ml carbenicillin, 20 µM IPTG with or without (control plate) the tested drug. Plates were supplemented with the following compounds: 2 µg/ml fusidic acid (FUA), 8 µg/ml doxorubicin (DOX), 250 µg/ml TPP, 1 µg/ml chloramphenicol (CAM), 60 µg/ml rhodamine-6G (R6G), 60 µg/ml ethidium (ETH), 1 µg/ml doxycycline (DXT), 1 µg/ml minocycline (MIN), and 0.01 µg/ml levofloxacin (LFX). All experiments were performed in triplicate. **B** Western blot analysis of DDM-solubilized protein samples before (-) and after (+) ultracentrifugation to detect levels of correctly folded AcrB, AdeB WT and variants via His-tag. Western Blot analysis has been done in triplicate, twice with whole cell lysates and once with DDM-solubilized protein samples as shown here. All results and uncropped images are available in Source Data.

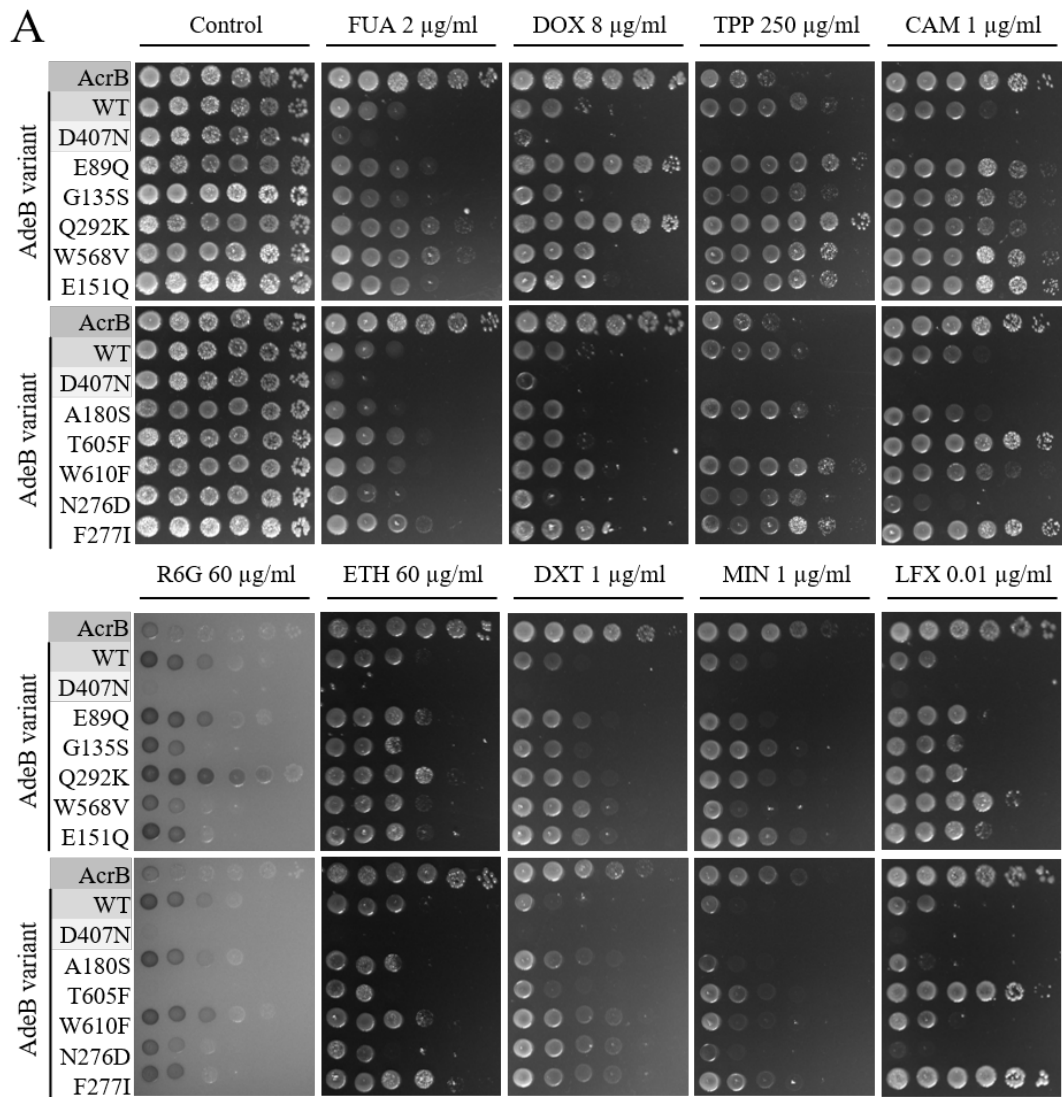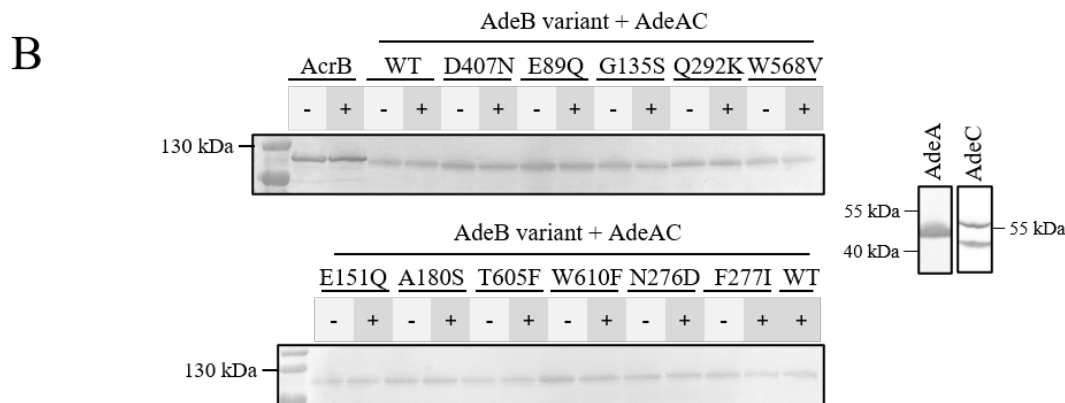

Supplementary Figure 12. **Comparison of drug susceptibilities of *E. coli* cells harbouring *E. coli* AcrB, wildtype *A. baumannii* AdeB (WT), inactive mutant (D407N) and deep binding pocket AdeB to AcrB single-substitution variants (E89Q, G135S, Q292K, W568V, E151Q, A180S, T605F, W610F, N276D, F277I).** **A** Plate dilution assays were performed with *E. coli* BW25113  $\Delta$ *acrB*  $\Delta$ *acrD*  $\Delta$ *mdtBC* pRSFDuetFX\_MS\_adeAC harbouring pET24\_ocrB or p7XC3H\_adeB\_WT and mutants. Dilution series of overnight cultures with an OD600 of  $10^0$ ,  $10^{-1}$ ,  $10^{-2}$ ,  $10^{-3}$ ,  $10^{-4}$  and  $10^{-5}$  were spotted on a Mueller-Hinton Agar plate containing 50 µg/ml kanamycin, 50 µg/ml carbenicillin, 20 µM IPTG with or without (control plate) the tested drug. Plates were supplemented with the following compounds: 2 µg/ml fusidic acid (FUA), 8 µg/ml doxorubicin (DOX), 250 µg/ml TPP, 1 µg/ml chloramphenicol (CAM), 60 µg/ml rhodamine-6G (R6G), 60 µg/ml ethidium (ETH), 1 µg/ml doxycycline (DXT), 1 µg/ml minocycline (MIN), and 0.01 µg/ml levofloxacin (LFX). All experiments were performed in triplicate. **B** Western blot analysis of DDM-solubilized protein samples before (-) and after (+) ultracentrifugation to detect levels of correctly folded AcrB, AdeB WT and variants via His-tag. Western Blot analysis has been done in triplicate, twice with whole cell lysates and once with DDM-solubilized protein samples as shown here. All results and uncropped images are provided in a Source Data file.

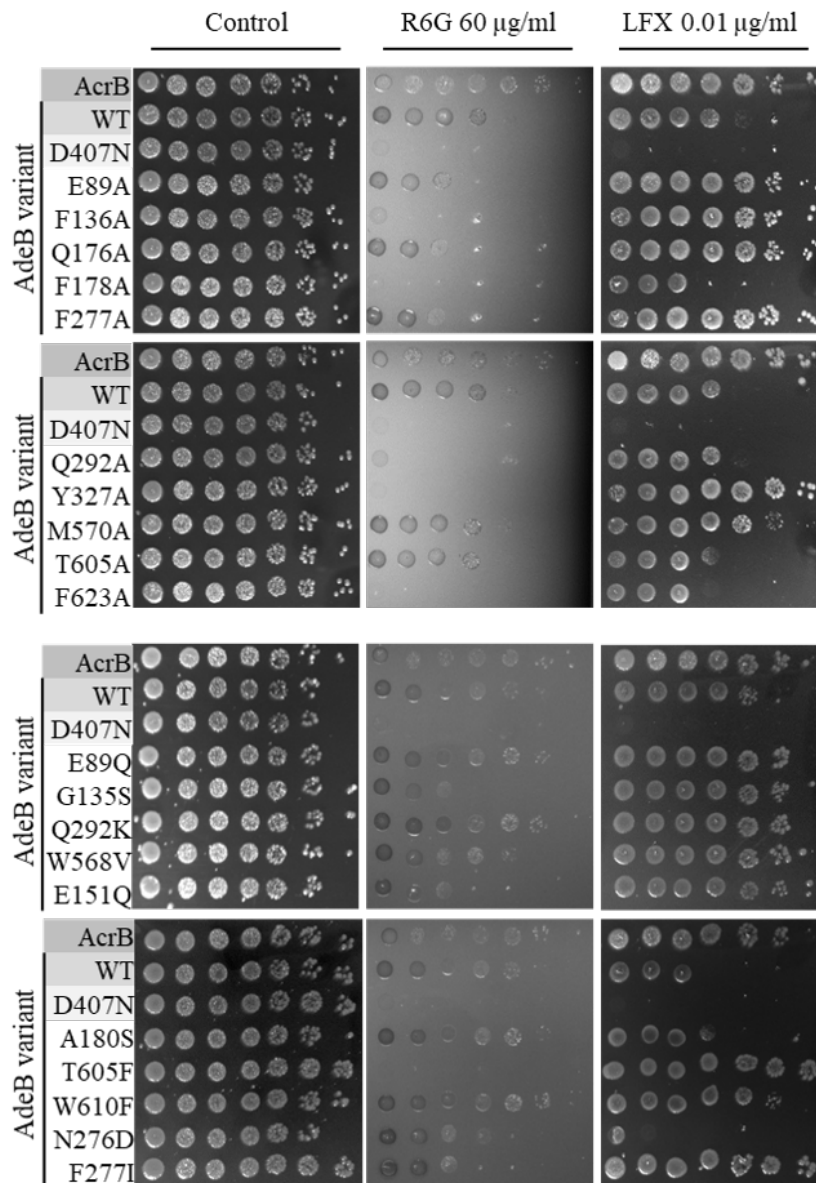

Supplementary Figure 13. Comparison of drug susceptibilities of *E. coli* cells harbouring *E. coli* AcrB, wildtype *A. baumannii* AdeB (WT), inactive mutant (D407N) and deep binding pocket variants (E89A, F136A, Q176A, F178A, F277A, Q292A, Y327A, M570A, T605A, F623A, E89Q, G135S, Q292K, W568V, E151Q, A180S, T605F, W610F, N276D, F277I). Plate dilution assays were performed with *E. coli* BW25113  $\Delta$ acrB  $\Delta$ acrD  $\Delta$ mdtBC pRSFD\_adeAC harbouring pET24\_acrB or p7XC3H\_adeB\_WT or mutants. Dilution series of overnight cultures with an OD<sub>600</sub> of 10<sup>0</sup>, 10<sup>-1</sup>, 10<sup>-2</sup>, 10<sup>-3</sup>, 10<sup>-4</sup> and 10<sup>-5</sup> were spotted on a Mueller-Hinton Agar plate containing 20 µM IPTG (w/o additional antibiotics) with or without (control plate) the tested drug. Plates were supplemented with 60 µg/ml rhodamine-6G (R6G) or 0.01 µg/ml levofloxacin (LFX). All experiments were performed in triplicate and source data are provided as a Source Data file.

A

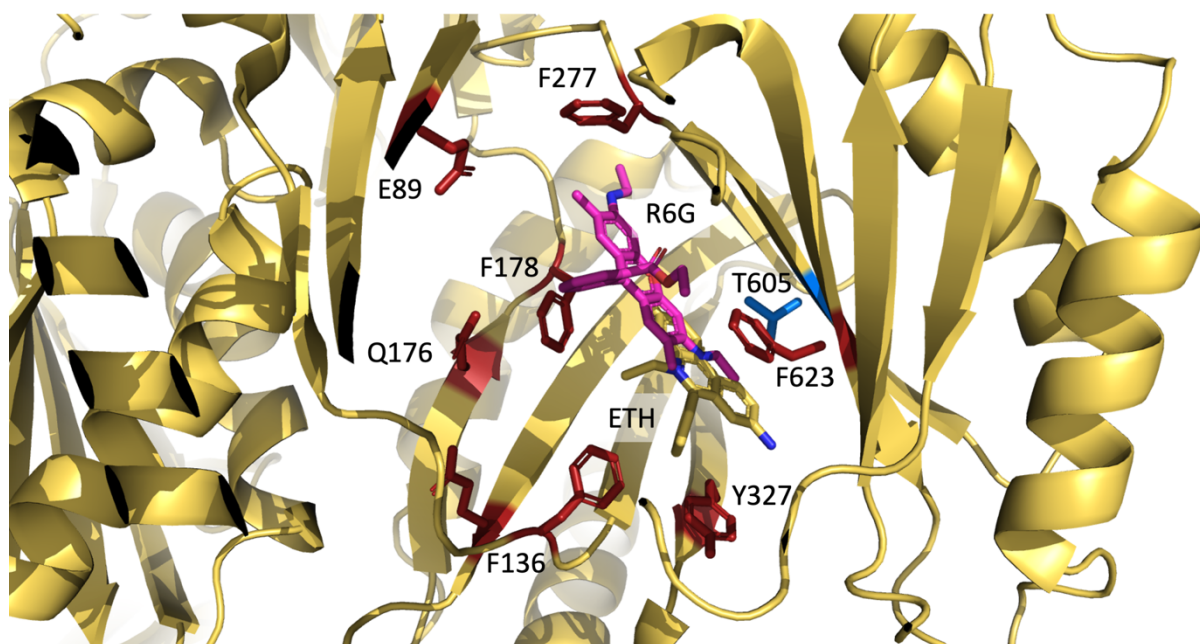

B

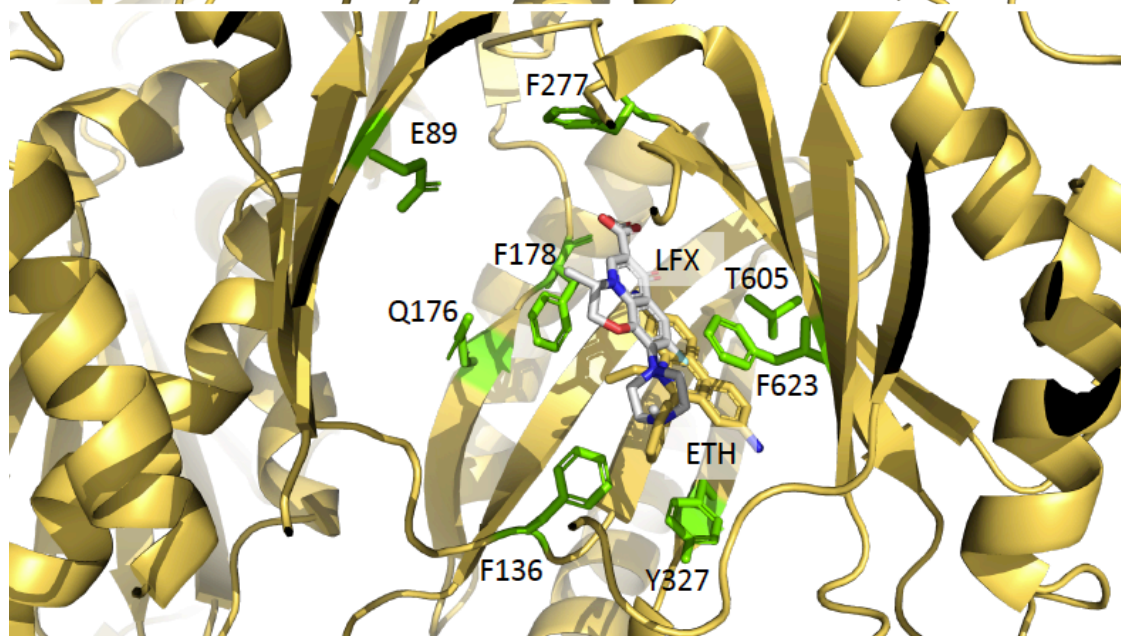

Supplementary Figure 14. **Superimpositions of drug binding in the deep binding pocket (DBP) of AcrB and AdeB.** The AdeB T protomer DBP region is displayed as yelloworange cartoon. Superimposition of **A** AcrBper with rhodamine 6G (R6G, magenta) bound (PDB: 5ENS). Residues which are negatively affecting the susceptibilities for R6G after substitution with Ala are indicated as red sticks. T605 is indicated as blue stick. **B** AcrBper with levofloxacin (LFX, grey) bound (PDB: 7B8T, this work) to the AdeB T protomer with ethidium (ETH, yelloworange) bound (PDB: 7KGI). For AcrBper, only the superimposed drugs are shown. Residues which are positively affecting the susceptibilities for LFX after substitution with Ala are indicated as green sticks.

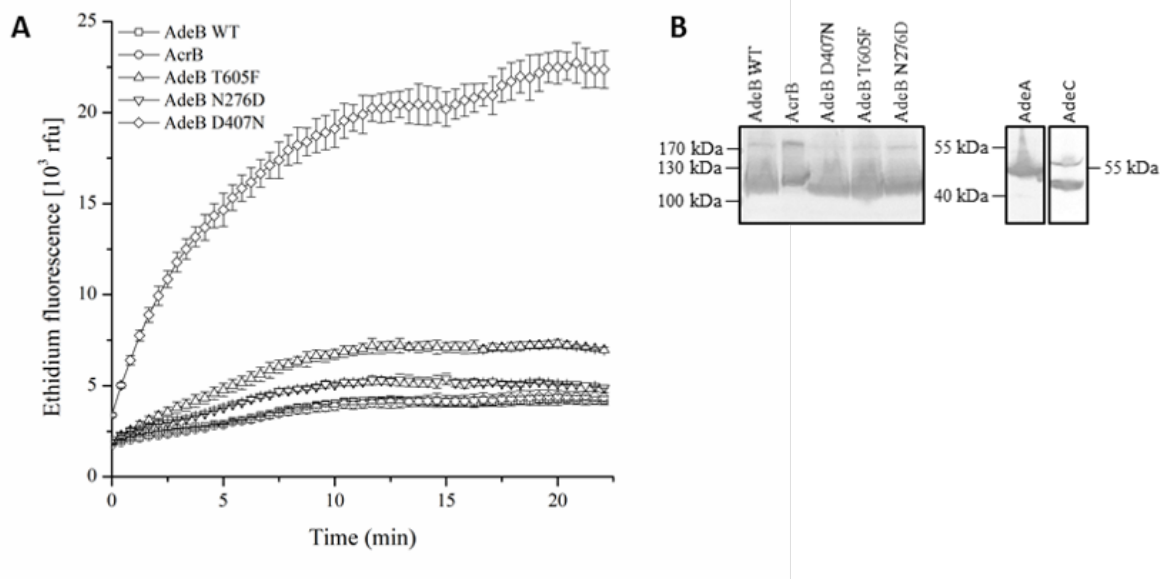

Supplementary Figure 15. **Effect of DBP mutations on the extrusion of ethidium from cells.** **A** Time-dependent accumulation of ethidium in *E. coli* BW25113  $\Delta$ *acrB*  $\Delta$ *acrD*  $\Delta$ *mdtBC* pRSFD\_adeAC expressing *acrB*, *adeB* WT, D407N, T605F and N276D visualized by increase of fluorescence intensity. *AcrB* and *AdeB* WT mediate efficient efflux of ethidium from the cells, while the inactive variant *AdeB* D407N cannot abolish the cellular accumulation of the drug. *AdeB* T605F and, to a lower extent, *AdeB* N276D showed a reduced viability in the presence of ethidium. This can be confirmed by the increased ethidium accumulation in cells producing these mutants. Experiments were performed in triplicate (n=3, biological triplicates, data available in a Source Data file, one biological experiment is shown here); error bars represent the standard deviation of two technical replicate measurements. Rfu: relative fluorescence units **B** Validation of protein expression by Western Blot analysis. *AcrB*, *AdeB* WT and mutants were detected via His-tag, *AdeA* and *AdeC* via Myc- und Strep-tag. Uncropped images of the blots are available in a Source Data file.



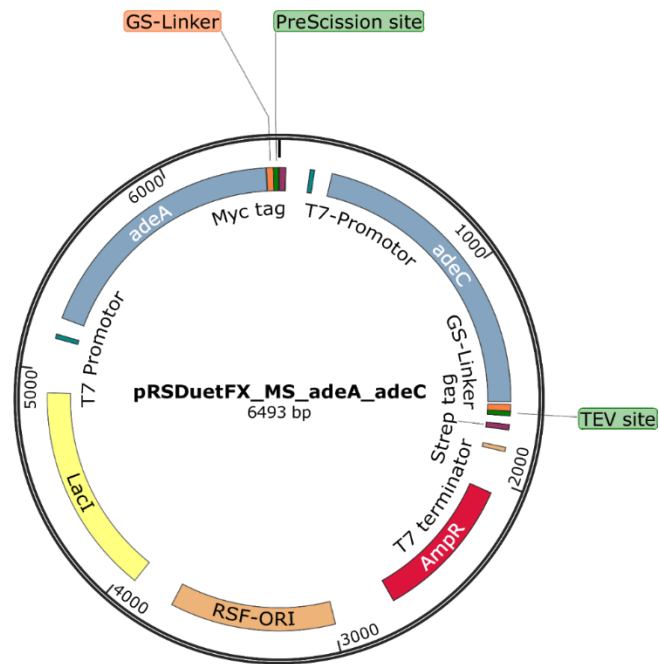

Supplementary Figure 16. **Schematic overview of pRSFDuetFX\_MS\_adeA\_adeC for the heterologous co-expression of *adeAC*.** The vector is based on pRSFDuet-1 (Novagen) and was modified in several steps. It contains a FX-cloning compatible multiple cloning site (MCS) coupled to a sequence encoding a PreScission protease cleavable Myc-tag. A second, pET24a-derived MCS was incorporated and modified to contain restriction sites for KpnI, NdeI and PacI. Furthermore, a tobacco etch virus (TEV) protease-cleavable Strep tag-encoding sequence was fused to the 5' end of the MCS. The gene *adeA* was cloned in the FX-cloning compatible MCS, so that the resulting gene product will be fused to a Myc-tag. The *adeC* gene was inserted into the pET24a-derived MCS using KpnI and PacI. The resulting gene product will be fused to a Strep-tag. Additionally, the kanamycin resistance cassette was exchanged with an ampicillin resistance gene.

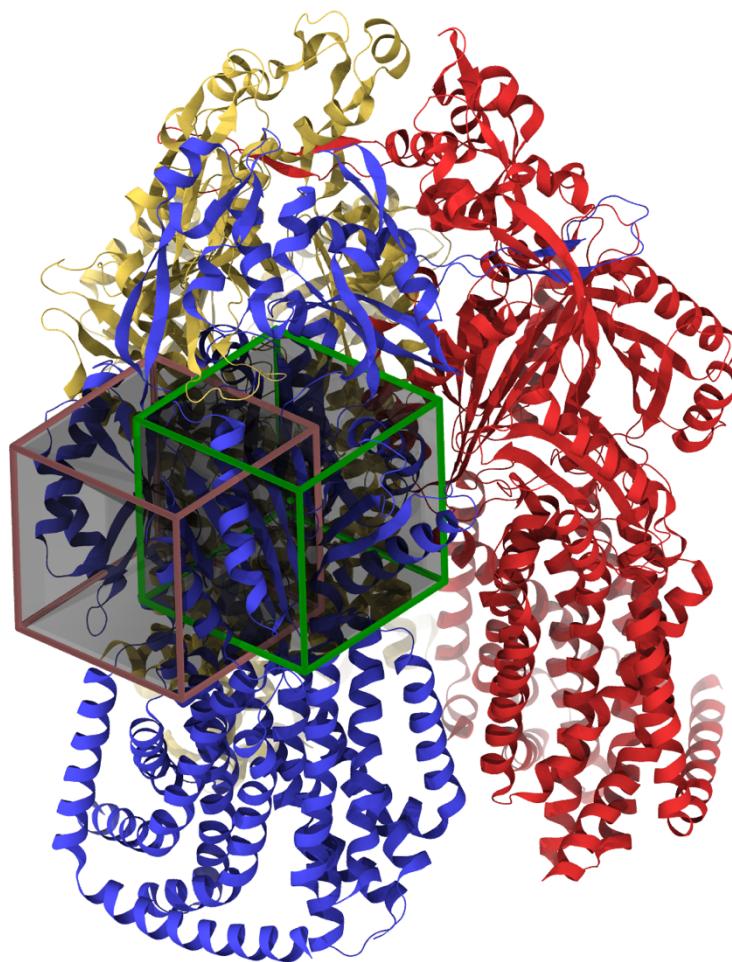

Supplementary Figure 17. **Docking volumes.** Visual representation of the two docking volumes employed in docking calculations with both Autodock VINA and GNINA. The centres of the two rectangular boxes, both of dimensions  $30 \times 30 \times 30 \text{ \AA}^3$ , have been taken from the centers of mass of ETH molecules bound in the cryo-EM structures of AdeB (PDB\_IDs: 7KGI and 7KGG) and while reported on the L monomer here, they are centered on the L (dark red box) and T (dark green) monomers, respectively. L, T, and O monomers are colored blue, yellow and red, respectively.

Supplementary Table 1: Statistics of cryo-EM data collection and processing from two merged datasets.

| Cryo-EM data collection/processing              |                              |
|-------------------------------------------------|------------------------------|
| Electron microscope                             | Titan Krios with K2 detector |
| Voltage [kV]                                    | 300                          |
| Magnification [x]                               | 130,000                      |
| Pixel size [Å]                                  | 1.05                         |
| Defocus range [µm]                              | -1.0 to -3.5 / -1.5 to 4.0   |
| Energy filter width [eV]                        | 20                           |
| Exposure time [s]                               | 10.6 / 8.16                  |
| Dose rate [(e <sup>-</sup> /Å <sup>2</sup> )/s] | 5.65 / 7.45                  |
| Number of frames per image                      | 48 / 48                      |
| Total dose                                      | 60 / 60.8                    |
| No. of micrographs                              | 990 / 1007                   |
| Initial particle number                         | 381,631                      |
| FSC threshold                                   | 0.143                        |
| AdeB OOO                                        |                              |
| Final particle number                           | 132,346                      |
| Symmetry                                        | C3                           |
| Resolution [Å]                                  | 3.54                         |
| AdeB T                                          |                              |
| Final particle number                           | 35,170                       |
| Symmetry                                        | C1                           |
| Resolution [Å]                                  | 3.95                         |
| AdeB L*OO                                       |                              |
| Final particle number                           | 34,890                       |
| Symmetry                                        | C1                           |
| Resolution [Å]                                  | 3.84                         |

Supplementary Table 2. RMSDs (in Å) of the AdeB O and L\* conformations (C $\alpha$ -atoms) compared to published structures of RND transporters. C $\alpha$  RMSDs were calculated with SUPERPOSE (<https://www.ebi.ac.uk/msd-srv/ssm/cgi-bin/ssmserver>), the numbers marked with an asterisk (\*) are calculated with Pymol, www.pymol.org)

| Protein         | Conformation | PDB  | Reference | RMSD AdeB O | RMSD AdeB L* |
|-----------------|--------------|------|-----------|-------------|--------------|
| AcrB            | L            | 4DX5 | 10        | 1.1         | 0.89         |
| AcrB            | T            | 4DX5 | 10        | 1.25        | 0.68         |
| AcrB            | O            | 4DX5 | 10        | 0.65        | 1.27         |
| AdeB            | O            | 6OWS | 29        | 1.14        | 2.69         |
| MexB            | L            | 6IIA | 31        | 1.71        | 1.93         |
| MexB            | T            | 6IIA | 31        | 1.31        | 0.74         |
| MexB            | O            | 6IIA | 31        | 0.68        | 1.28         |
| CmeB            | O            | 5LQ3 | 43        | 0.95        | 1.41         |
| CmeB            | Resting      | 5LQ3 | 43        | 1.6         | 1.1          |
| MtrD            | L            | 4MT1 | 32        | 1.37        | 1.45         |
| CusA            | apo (O)      | 3K07 | 33        | 0.46        | 1.19         |
| CusA            | Cu(I) (L)    | 3K0I | 33        | 3.05*       | 2.60*        |
| AdeB-I          | O            | 7KGD | 30        | 0.91        | 2.59         |
| AdeB-<br>Et-I   | O            | 7KGG | 30        | 1.07        | 2.79         |
|                 | T            | 7KGG |           | 2.79        | 1.55         |
| AdeB-<br>Et-II  | Resting      | 7KGH | 30        | 1.97        | 2.84         |
|                 | T            |      |           | 2.85        | 1.76         |
|                 | O            |      |           | 1.35        | 2.96         |
| AdeB-<br>Et-III | L            | 7KGI | 30        | 2.55        | 2.13         |
|                 | T            |      |           | 2.83        | 1.81         |
|                 | O            |      |           | 1.39        | 3.01         |

Supplementary Table 3. Statistics of AdeB cryo-EM structures in OOO and L\*OO conformations.

| Structure statistics         | AdeB OOO | AdeB L*OO |
|------------------------------|----------|-----------|
| Overall resolution (Å)       | 3.54     | 3.84      |
| <b>RMSD</b>                  |          |           |
| Bond length (Å)              | 0.006    | 0.005     |
| Bond angles (°)              | 1.132    | 1.139     |
| <b>Validation</b>            |          |           |
| MolProbity score             | 1.51     | 1.62      |
| Clash score                  | 4.10     | 5.63      |
| Rotamers outliers (%)        | 0.75     | 0.79      |
| C $\beta$ outliers (%)       | 0.00     | 0.00      |
| <b>Ramachandran plot (%)</b> |          |           |
| Allowed                      | 4.55     | 4.56      |
| Favored                      | 95.45    | 95.44     |
| Disallowed                   | 0.00     | 0.00      |
| CC (mask)                    | 0.84     | 0.80      |
| CC (box)                     | 0.76     | 0.74      |
| CC (volume)                  | 0.81     | 0.78      |

Supplementary Table 4. **Redocking of ETH into AdeB**. Top five docking poses obtained after docking ETH in the cryo-EM structure of AdeB (PDB\_ID: 7KGI), using both Autodock VINA and GNINA packages. ETH was considered flexible during docking, while the receptor was assumed rigid. The top (bottom) tables refer to the ligand bound in the AP (DBP) of the L\* (or T) monomer. Docking affinities and root-mean-squared-displacements (RMSD) are expressed in kcal/mol and Å, respectively. Predicted binding modes with RMSD < 2.5 Å are highlighted in green. In the case of the GNINA software, binding modes are ordered according to both binding affinity and convolution neural network (CNN) score.

| AUTODOCK VINA |          |      | GNINA AFFINITY |          |      | GNINA SCORE |           |      |
|---------------|----------|------|----------------|----------|------|-------------|-----------|------|
| mode          | affinity | RMSD | mode           | affinity | RMSD | mode        | CNN score | RMSD |
| 1             | -8.4     | 6.75 | 1              | -8.73    | 2.31 | 1           | 0.9588    | 4.85 |
| 2             | -8.3     | 2.27 | 2              | -8.69    | 2.30 | 2           | 0.8918    | 2.30 |
| 3             | -8.3     | 2.27 | 3              | -8.51    | 5.38 | 3           | 0.8904    | 5.23 |
| 4             | -8.2     | 7.93 | 4              | -8.45    | 1.62 | 4           | 0.8897    | 2.31 |
| 5             | -8.1     | 5.38 | 5              | -8.45    | 5.23 | 5           | 0.8803    | 4.00 |

| AUTODOCK VINA |          |      | GNINA AFFINITY |          |      | GNINA SCORE |           |       |
|---------------|----------|------|----------------|----------|------|-------------|-----------|-------|
| mode          | affinity | RMSD | mode           | affinity | RMSD | mode        | CNN score | RMSD  |
| 1             | -8.4     | 0.72 | 1              | -8.86    | 0.72 | 1           | 0.8810    | 0.72  |
| 2             | -8.1     | 5.08 | 2              | -8.84    | 0.87 | 2           | 0.8750    | 0.87  |
| 3             | -7.8     | 2.06 | 3              | -8.51    | 5.08 | 3           | 0.6340    | 5.08  |
| 4             | -7.8     | 5.70 | 4              | -8.25    | 2.04 | 4           | 0.4985    | 13.28 |
| 5             | -7.8     | 5.72 | 5              | -8.03    | 5.89 | 5           | 0.4934    | 2.04  |

Supplementary Table 5. **Crystallographic data collection and refinement statistics.** Values for the highest-resolution shell are shown in parentheses.

|                                                         | Doxycycline, DXT                    | Fusidic acid, FUA                   | Levofloxacin, LFX                   |
|---------------------------------------------------------|-------------------------------------|-------------------------------------|-------------------------------------|
| pdb entry                                               | 7B8R                                | 7B8S                                | 7B8T                                |
| <b>Data collection</b>                                  |                                     |                                     |                                     |
| Beamline                                                | DESY, P13                           | DESY                                | Soleil, PXI                         |
| Wavelength (Å)                                          | 0.9762                              | 0.9762                              | 0.9786                              |
| Resolution range (Å)                                    | 48.8 - 2.1 (2.175 - 2.1)            | 49.83 - 2.3 (2.382 - 2.3)           | 49.75 - 2.7 (2.797 - 2.7)           |
| Space group                                             | P 21 21 21                          | P 21 21 21                          | P 21 21 21                          |
| Unit cell a, b, c (Å) $\alpha$ , $\beta$ , $\gamma$ (°) | 108.515 145.422 174.173<br>90 90 90 | 109.709 145.237 175.405<br>90 90 90 | 108.652 145.488 175.156<br>90 90 90 |
| Total reflections                                       | 2171301 (223406)                    | 1119560 (114224)                    | 501524 (51221)                      |
| Unique reflections                                      | 158834 (15593)                      | 124264 (12209)                      | 75440 (7570)                        |
| Multiplicity                                            | 13.7 (14.3)                         | 9.0 (9.4)                           | 6.6 (6.8)                           |
| Completeness (%)                                        | 98.81 (98.01)                       | 99.65 (99.20)                       | 97.93 (99.53)                       |
| Mean I/ $\sigma$ (I)                                    | 14.87 (1.46)                        | 12.67 (1.61)                        | 9.17 (0.91)                         |
| Wilson B-factor                                         | 41.76                               | 37.19                               | 60.84                               |
| R-merge                                                 | 0.1238 (2.08)                       | 0.1552 (1.387)                      | 0.192 (2.235)                       |
| R-meas                                                  | 0.1287 (2.156)                      | 0.1644 (1.466)                      | 0.2086 (2.422)                      |
| R-pim                                                   | 0.03475 (0.5647)                    | 0.05321 (0.4697)                    | 0.08072 (0.9251)                    |
| CC1/2                                                   | 0.999 (0.65)                        | 0.997 (0.62)                        | 0.997 (0.502)                       |
| CC*                                                     | 1 (0.887)                           | 0.999 (0.875)                       | 0.999 (0.818)                       |
| <b>Refinement</b>                                       |                                     |                                     |                                     |
| Reflections used in refinement                          | 158777 (15588)                      | 124243 (12209)                      | 75271 (7550)                        |
| Reflections used for R-free                             | 7810 (744)                          | 6126 (619)                          | 3744 (390)                          |
| R-work                                                  | 0.2033 (0.2943)                     | 0.1999 (0.2872)                     | 0.2198 (0.3731)                     |
| R-free                                                  | 0.2400 (0.3307)                     | 0.2460 (0.3464)                     | 0.2691 (0.4119)                     |
| CC(work)                                                | 0.959 (0.807)                       | 0.948 (0.776)                       | 0.939 (0.710)                       |
| CC(free)                                                | 0.948 (0.763)                       | 0.928 (0.677)                       | 0.895 (0.593)                       |
| Number of non-hydrogen atoms                            | 17678                               | 17656                               | 16823                               |
| macromolecules                                          | 16890                               | 16885                               | 16787                               |
| ligands                                                 | 99                                  | 37                                  | 26                                  |
| solvent                                                 | 689                                 | 734                                 | 10                                  |
| Protein residues                                        | 2220                                | 2219                                | 2204                                |
| RMS(bonds)                                              | 0.004                               | 0.004                               | 0.004                               |
| RMS(angles)                                             | 0.96                                | 0.93                                | 0.94                                |
| Ramachandran favored (%)                                | 96.95                               | 97.27                               | 96.79                               |
| Ramachandran allowed (%)                                | 2.96                                | 2.69                                | 2.98                                |
| Ramachandran outliers (%)                               | 0.09                                | 0.05                                | 0.23                                |
| Rotamer outliers (%)                                    | 0.00                                | 0.06                                | 0.23                                |
| Clashscore                                              | 2.28                                | 1.67                                | 3.93                                |
| Average B-factor                                        | 51.44                               | 39.41                               | 65.29                               |
| macromolecules                                          | 51.63                               | 39.55                               | 65.27                               |
| ligands                                                 | 59.12 (all)                         | 77.77                               | 82.95                               |
|                                                         | 54.12 (DXT-1)                       |                                     |                                     |
|                                                         | 68.40 (DXT-2)                       |                                     |                                     |
| solvent                                                 | 45.72                               | 34.18                               | 51.30                               |

Supplementary Table 6. **Analysis of plate dilution assays with *E. coli* AcrB and DBP variants (F136A, F178A, Y327A, F610A, and F628A).** Plate dilution assays were performed with *E. coli* BW25113  $\Delta$ acrB  $\Delta$ acrD  $\Delta$ mdtBC pRSFDuetFX\_MS\_adeAC harboring pET24\_acrB or mutants. Dilution series of overnight cultures with an OD<sub>600nm</sub> of 10<sup>0</sup>, 10<sup>-1</sup>, 10<sup>-2</sup>, 10<sup>-3</sup>, 10<sup>-4</sup> and 10<sup>-5</sup> (6 dilution steps) were spotted on Mueller-Hinton agar plates containing 50 µg/ml kanamycin, 50 µg/ml carbenicillin and 20 µM IPTG, with or without (control plate) the tested drug (see Figure S10). Plates were supplemented with the following compounds: 60 µg/ml rhodamine-6G (R6G), 100 µg/ml tetraphenylphosphonium (TPP), 0.01 µg/ml levofloxacin (LFX), and 1 µg/ml chloramphenicol (CAM). All experiments were performed in triplicate. The last dilution steps showing cell growth were documented and averaged. The table indicates the calculated difference to AcrB WT after subtraction of the negative control (D407N). Positive results (green shadings) indicate increased resistance to the drug compared to AdeB WT, negative results (red shadings) indicate decreased resistance. As a comparison, results from Figure 6, with cells harbouring AdeB or AdeB variants are shown.

#### AcrB variants

| Substrate    | R6G   | TPP   | LFX   | CAM   |
|--------------|-------|-------|-------|-------|
| Conc [µg/ml] | 60    | 100   | 0.01  | 1     |
| AcrB WT      | 0,00  | 0,00  | 0,00  | 0,00  |
| F136A        | -5,33 | -0,33 | 0,00  | 0,00  |
| F178A        | -4,67 | -1,22 | -4,56 | 0,00  |
| Y327A        | -2,44 | -2,22 | -2,33 | -3,00 |
| F610A        | -4,78 | -5,11 | -5,33 | -4,33 |
| F628A        | -4,11 | -3,22 | -2,00 | 0,00  |

#### AdeB variants

| Substrate    | R6G   | TPP   | LFX  | CAM   |
|--------------|-------|-------|------|-------|
| Conc [µg/ml] | 60    | 250   | 0.01 | 1     |
| AdeB WT      | 0,00  | 0,00  | 0,00 | 0,00  |
| F136A        | -4,33 | -4,00 | 3,67 | 2,67  |
| F178A        | -4,33 | -4,00 | 0,00 | -0,33 |
| Y327A        | -4,33 | -4,00 | 4,00 | 2,00  |
| T605A        | -0,67 | -1,00 | 0,00 | -1,33 |
| T605F        | -4,33 | -4,00 | 3,00 | 3,33  |
| F623A        | -4,33 | -4,00 | 0,00 | -1,00 |

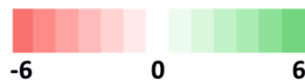



Supplementary Table 7. List of primers used in this study.

| Insertion of <i>adeA</i> , <i>adeC</i> into pRSFDuetFX_MS and of <i>adeB</i> into p7XC3H |                           |                                              |
|------------------------------------------------------------------------------------------|---------------------------|----------------------------------------------|
| No.                                                                                      | Primer name               | Primer sequence                              |
| 21                                                                                       | <i>adeA</i> _FX_FW        | atatatgctcttctagtgacagtatgcaaaagcatctttacttc |
| 22                                                                                       | <i>adeA</i> _PX_RV        | tatatagctcttcatgctggttgcgccccctc             |
| 23                                                                                       | <i>adeB</i> _FX_FW        | atatatgctcttctagtatgtcacaatTTTTtattcgtcgtc   |
| 24                                                                                       | <i>adeB</i> _FX_RV        | tatatagctcttcatgcggatgagattTTTTtcttagaggaaa  |
| 25                                                                                       | <i>adeC</i> _KpnI_PacI_FW | atatatggtacctctaaatcggcaatcgtatc             |
| 26                                                                                       | <i>adeC</i> _KpnI_PacI_RV | tatatattaattaagacttttgatattcctcctcc          |
| Site-directed mutagenesis of <i>adeB</i>                                                 |                           |                                              |
| No.                                                                                      | Primer name               | Primer sequence                              |
| 27                                                                                       | <i>adeB</i> _D407N_FW     | aacgatgccattgtgtcg                           |
| 28                                                                                       | <i>adeB</i> _D407N_RV     | gacaataatcccgatggcaag                        |
| 29                                                                                       | <i>adeB</i> _E89Q_FW      | cagattaccgctacgtttaaacc                      |
| 30                                                                                       | <i>adeB</i> _E89Q_RV      | tgtgtaccggaggatc                             |
| 31                                                                                       | <i>adeB</i> _G135S_FW     | agcttttaaatgctggtcgggatt                     |
| 32                                                                                       | <i>adeB</i> _G135S_RV     | ggacgatgaagcttcaacc                          |
| 33                                                                                       | <i>adeB</i> _Q292K_FW     | aaattaagcccgggagctaac                        |
| 34                                                                                       | <i>adeB</i> _Q292K_RV     | aattgcagccgcgtag                             |
| 35                                                                                       | <i>adeB</i> _W568V_FW     | gtgtcatgacttcgtccag                          |
| 36                                                                                       | <i>adeB</i> _W568V_RV     | acctgatcttcctctgg                            |
| 37                                                                                       | <i>adeB</i> _E151Q_FW     | caagttgatttgagtgattattg                      |
| 38                                                                                       | <i>adeB</i> _E151Q_RV     | ggaatattgattattggagag                        |
| 39                                                                                       | <i>adeB</i> _A180S_FW     | tctgagaaaagctatgcgtattg                      |
| 40                                                                                       | <i>adeB</i> _A180S_RV     | accgaaagattgaaccttcc                         |
| 41                                                                                       | <i>adeB</i> _T605F_FW     | agtaatttcgccattttggga                        |
| 42                                                                                       | <i>adeB</i> _T605F_RV     | ttttacatcgggattgtcttc                        |
| 43                                                                                       | <i>adeB</i> _W610F_FW     | tttggttttagtggtgcag                          |
| 44                                                                                       | <i>adeB</i> _W610F_RV     | tcccaaatggcggattac                           |

|    |                     |                          |
|----|---------------------|--------------------------|
| 45 | adeB_N276D_FW       | gcatatgactttgccattttgg   |
| 46 | adeB_N276D_RV       | ttgtgaacctatttctacattgg  |
| 47 | adeB_F277I_FW       | gcatataacattgccattttgg   |
| 48 | adeB_F277I_RV       | ttgtgaacctatttctacattgg  |
| 49 | adeB_E89A_FW        | gcgattaccgctacgtttaaac   |
| 50 | adeB_E89Q_RV        | see Primer No. 30        |
| 51 | adeB_F136A_FW       | ggagcattaatgctggctcggg   |
| 52 | adeB_G135S_RV       | see Primer No. 32        |
| 53 | adeB_Q176A_FW       | gcatctttcgggtgcagagaaagc |
| 54 | adeB_Q176A/F178A_RV | aaccttcctacaccttcgac     |
| 55 | adeB_F178A_FW       | caatctgccggtgcagagaa     |
| 56 | adeB_Q176A/F178A_RV | see Primer No. 54        |
| 57 | adeB_F277A_FW       | gcatataacgctgccattttgg   |
| 58 | adeB_F277I_RV       | see Primer No. 48        |
| 59 | adeB_Q292A_FW       | gcattaagcccgggagctaac    |
| 60 | adeB_Q292K_RV       | see Primer No. 34        |
| 61 | adeB_Y327A_FW       | attcctgcagacaccgcg       |
| 62 | adeB_Y327A_RV       | actaaattccatgccttccg     |
| 63 | adeB_M570A_FW       | tggttcgcgacttcgtcc       |
| 64 | adeB_W568V_RV       | see Primer No. 36        |
| 65 | adeB_T605A_FW       | agtaatgccgccattttggga    |
| 66 | adeB_T605F_RV       | see Primer No. 42        |
| 67 | adeB_F623A_FW       | gtagctgtggctgcaacgaca    |
| 68 | adeB_F623A_RV       | atthtgcctgcaccactaa      |

---
